# Supplementary material
Source: PubMed Central journal article supplement (PMC4237723)
Supplement: NIHMS630185-supplement-Supp_TableS1-S2___FigureS1-S2.pdf [file NIHMS630185-supplement-Supp_TableS1-S2___FigureS1-S2.pdf]

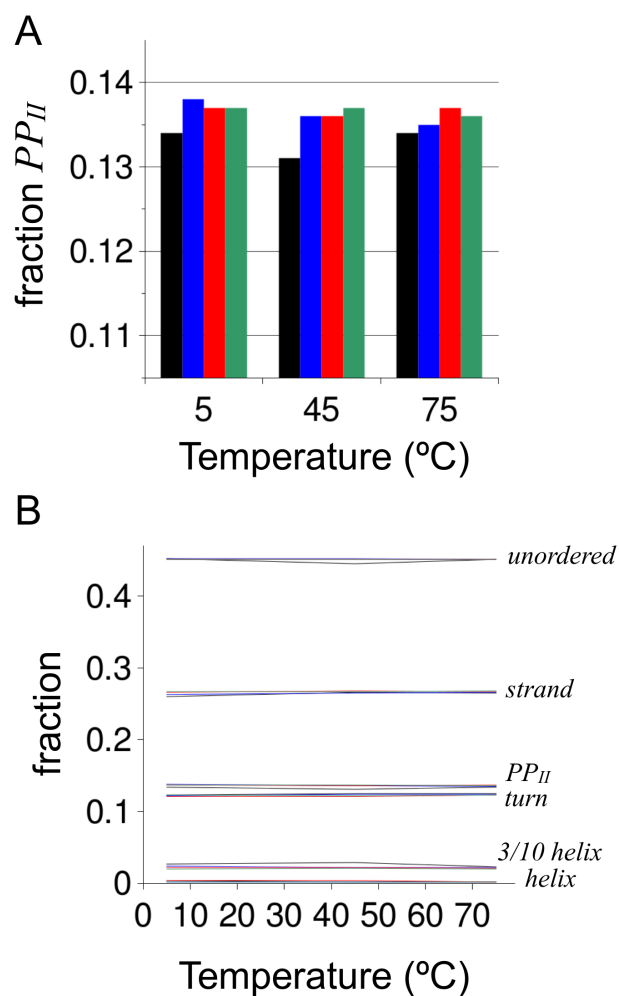

**Figure S1. Fraction of residues with  $PP_{II}$  structure predicted from the CD spectrum of p53(1-93) using the CONTIN/LL algorithm and SP22X basis set.** In both panels, values for wild type were shown with black, ALA<sup>-</sup> with blue, PRO<sup>-</sup> with red, and ALA<sup>-</sup>PRO<sup>-</sup> with green. In panel **A**, the  $PP_{II}$  propensities returned by the CD fitting routine for spectra measured at 5°C, 45°C, and 75°C were given by the columns. In panel **B**, lines provide a comparison of the  $PP_{II}$  propensities to the other secondary structure elements (as indicated in the figure) returned by the CD fitting routine.

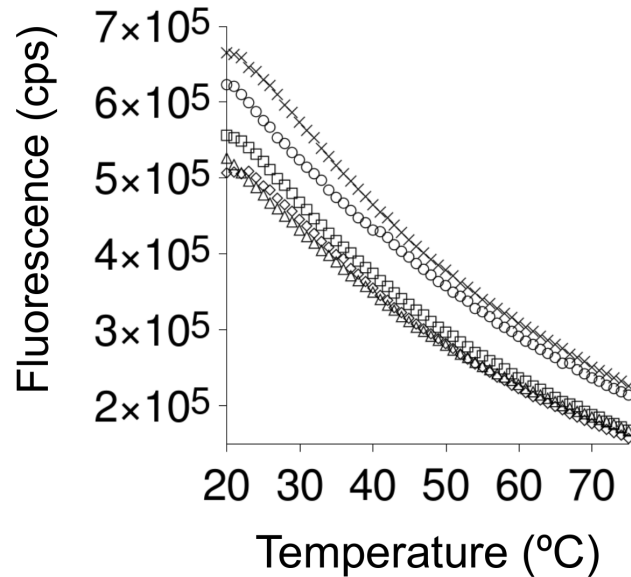

**Figure S2. Temperature effects on acrylamide induced fluorescence quenching.** The temperature dependence in the fluorescence of p53(1-93) in the presence of 50 mM aqueous acrylamide is shown for wild type (circles), ALA<sup>-</sup> (squares), PRO<sup>-</sup> (triangles), and ALA<sup>-</sup>PRO<sup>-</sup> (diamonds). Temperature dependence in the fluorescence of NATA in the presence of 37.5 mM aqueous acrylamide is shown by X symbols. The observations of increased quenching with added heat and similarity to the acrylamide induced quenching of NATA fluorescence suggested a dynamic rather than static quenching mechanism for the p53(1-93) variants. Fluorescence emission was monitored at 359 nm from excitation at 295 nm. Temperature was incremented using a rate of 2°C min<sup>-1</sup>.

| <u>fitting parameter(s)</u>            | <u>correlation with <math>R_{h,rel}</math> (<math>R^2</math>)</u> |
|----------------------------------------|-------------------------------------------------------------------|
| $f_{ALA}$                              | 0.0001                                                            |
| $f_{PRO}$                              | 0.242                                                             |
| $Q_{net}$                              | 0.194                                                             |
| $f_{PRO}, Q_{net}$                     | 0.539                                                             |
| $f_{PRO}, Q_{net}, f_{ALA}$            | 0.542                                                             |
| $f_{PRO}, Q_{net}, random^*$           | $0.546 \pm 0.008$                                                 |
| $f_{ALA}$ - IDPs with $f_{PRO} > 0.10$ | 0.472                                                             |
| $f_{ALA}$ - IDPs with $Q_{net} > 10$   | 0.200                                                             |
| $Q_{net}$ - IDPs with $f_{PRO} > 0.10$ | 0.028                                                             |
| $Q_{net}$ - IDPs with $f_{PRO} < 0.10$ | 0.439                                                             |

**Table S1.**  $R_{h,rel}$  correlations with  $f_{ALA}$ ,  $f_{PRO}$ , and  $Q_{net}$ .  $R^2$  is the coefficient of determination calculated by multiple linear regression between the fitting parameter(s) and  $R_{h,rel}$ .

\* Random numbers from 0 to 1 generated for each IDP,  $R^2$  is the average of 10 trials.

| protein           | $N$ | $R_h$ | $R_{h,coil}$ | $R_{h,rel}$ | $RCS_{PPII}$ | $Q_{net}$ | $\#PRO$ | $\#ALA$ | $f_{PRO}$ | $f_{ALA}$ | DISPHOS score | # predicted phos sites |
|-------------------|-----|-------|--------------|-------------|--------------|-----------|---------|---------|-----------|-----------|---------------|------------------------|
| p53(1-93)         | 93  | 32.4  | 21.70        | 1.49        | 3.934        | 15        | 22      | 12      | 0.237     | 0.129     | 10.137        | 11                     |
| SBD               | 61  | 25.6  | 17.51        | 1.46        | 3.983        | 1         | 12      | 5       | 0.197     | 0.082     | 7.691         | 6                      |
| p53-TAD           | 73  | 23.8  | 19.18        | 1.24        | 2.405        | 14        | 13      | 4       | 0.178     | 0.055     | 8.303         | 9                      |
| p57-ID            | 73  | 24.0  | 19.18        | 1.25        | 2.468        | 7         | 4       | 5       | 0.055     | 0.068     | 3.836         | 2                      |
| PDE-gamma         | 87  | 24.8  | 20.97        | 1.18        | 2.014        | 4         | 10      | 4       | 0.115     | 0.046     | 4.443         | 5                      |
| Vmw65             | 89  | 28.0  | 21.22        | 1.32        | 2.818        | 19        | 6       | 10      | 0.067     | 0.112     | 7.482         | 10                     |
| LJIDP1            | 94  | 24.5  | 21.82        | 1.12        | 1.648        | 4         | 3       | 15      | 0.032     | 0.160     | 9.735         | 10                     |
| Hdm2-ABD          | 97  | 25.7  | 22.17        | 1.16        | 1.855        | 29        | 3       | 3       | 0.031     | 0.031     | 20.154        | 24                     |
| Mlph(147-240)     | 97  | 28.0  | 22.17        | 1.26        | 2.466        | 16        | 6       | 2       | 0.062     | 0.021     | 15.513        | 19                     |
| Sm1               | 105 | 23.4  | 23.08        | 1.01        | 1.059        | 5         | 5       | 7       | 0.048     | 0.067     | 11.513        | 11                     |
| prothymosin-alpha | 110 | 33.7  | 23.63        | 1.43        | 3.386        | 43        | 1       | 11      | 0.009     | 0.100     | 8.684         | 10                     |
| Cad136            | 136 | 28.1  | 26.33        | 1.07        | 1.303        | 9         | 13      | 12      | 0.096     | 0.088     | 16.651        | 20                     |
| alpha-synuclein   | 140 | 28.2  | 26.72        | 1.06        | 1.243        | 9         | 5       | 19      | 0.036     | 0.136     | 8.839         | 7                      |
| ShB-C             | 146 | 32.9  | 27.30        | 1.21        | 2.052        | 4         | 5       | 11      | 0.034     | 0.075     | 16.141        | 18                     |
| Fos-AD            | 168 | 35.0  | 29.32        | 1.19        | 1.964        | 16        | 20      | 14      | 0.119     | 0.083     | 27.942        | 28                     |
| HIFq-alpha-503    | 170 | 38.3  | 29.50        | 1.30        | 2.531        | 10        | 13      | 13      | 0.076     | 0.076     | 27.394        | 34                     |
| CFTR-R-region     | 189 | 32.0  | 31.13        | 1.03        | 1.111        | 5         | 8       | 8       | 0.042     | 0.042     | 20.307        | 19                     |
| Tau-K45           | 198 | 45.0  | 31.88        | 1.41        | 3.097        | 19        | 19      | 6       | 0.096     | 0.030     | 26.731        | 27                     |
| HIF1-alpha-403    | 202 | 44.3  | 32.20        | 1.38        | 2.899        | 29        | 22      | 12      | 0.109     | 0.059     | 29.359        | 33                     |
| Securin           | 204 | 39.7  | 32.36        | 1.23        | 2.111        | 1         | 24      | 13      | 0.118     | 0.064     | 20.199        | 25                     |
| Mlph(147-403)     | 260 | 49.0  | 36.62        | 1.34        | 2.644        | 29        | 20      | 17      | 0.077     | 0.065     | 37.728        | 46                     |
| SNAP25            | 206 | 39.7  | 32.52        | 1.22        | 2.077        | 14        | 2       | 16      | 0.010     | 0.078     | 8.234         | 8                      |

**Table S2.  $R_h$ ,  $RCS_{PPII}$ ,  $Q_{net}$ ,  $f_{PRO}$ ,  $f_{ALA}$ , and DISPHOS score for intrinsically disordered proteins.**  $N$  is the number of residues.  $R_h$  were from published reports (26,63-80).  $R_{h,coil}$  was calculated as  $2.16 * N^{0.509}$  (i.e., from equations 1 and 2 with  $S_{PPII} = 0$ ).  $R_{h,rel}$  was calculated as  $R_h/R_{h,coil}$ .  $RCS_{PPII}$  was calculated as  $\partial R_h / \partial f_{PPII}$  normalized to the statistical coil value.  $Q_{net}$  is the absolute value of the number of glutamic and aspartic residues minus the number of lysine and arginine residues.  $\#PRO$  and  $\#ALA$  are the number of proline and alanine residues, respectively.  $f_{PRO}$  is the number of proline residues divided by  $N$ .  $f_{ALA}$  is the number of alanine residues divided by  $N$ . DISPHOS score was calculated for an IDP sequence using the DISPHOS 1.3 website ([www.dabi.temple.edu/disphos/pred.html](http://www.dabi.temple.edu/disphos/pred.html)) with “Default Predictor” selected. The number of phosphorylation sites predicted by DISPHOS 1.3 for each IDP sequence is given by the column labeled “# predicted phos sites.”
